# Supplementary material for: Whole-Genome Analysis Reveals the Growth-Promoting and Biocontrol Potential of Bacillus amyloliquefaciens Ba. YN. J3 isolated from Avena sativa
Source: Research Square preprint supplement (doi:10.21203/rs.3.rs-8097513/v1), 2025-12-05
Supplement: Supplementary file 1 [file 236c33bfe13c9e8397b16270.docx]

| Table S1. Predicted genes associated with biocontrol activity in Ba.YN.J3 genome | | | |
| --- | --- | --- | --- |
| Ba.YN.J3-antifungal activities description | Gene name | Gene annotation | Chromosome location |
| Siderophore | *fhuA* | Ferrichrome transport ATP-binding protein | 422,724-423,482 |
|  | *fhuC* | Iron(3+)-hydroxamate import ATP-binding protein | 3,315,269-3,316,075 |
|  | *fhuG* | Iron(3+)-hydroxamate import system permease protein | 3,316,094-3,317,104 |
|  | *fhuB* | Iron(3+)-hydroxamate import system permease protein | 3,317,104-3,318,159 |
|  | *fhuD* | Iron(3+)-hydroxamate-binding protein | 3,318,389-3,319,327 |
| Hydrolase | *amyA* | Alpha-amylase | 327,965-329,944 |
|  | *aprE* | Subtilisin E | 1,066,766-1,067,914 |
|  | *gmuD* | 6-phospho-beta-glucosidase | 3,837,921-3,839,321 |
|  | *pel* | Pectate lyase | 781,646-782,911 |
|  | *eglS* | Endoglucanase | 1,917,337-1,918,782 |
|  | *sleL* | Cortical fragment-lytic enzyme | 24,672-25,952 |
|  | *ydhD* | Putative sporulation-specific glycosylase | 1,337,618-1,338,880 |
| Bioflim | *tasA* | Major biofilm matrix component | 2,613,490-2,614,275 |
|  | *bslA* | Biofilm-surface layer protein A | 3,098,790-3,099,329 |
|  | *bslB* | Probable biofilm-surface layer protein B | 3,761,586-3,762,050 |
| Chemotaxis | *cheB* | CheB-2 chemotaxis-specific methylesterase | 1,685,054-1,686,121 |
|  | *cheA* | Chemotaxis protein histidine kinase | 1,686,097-1,688,145 |
|  | *cheC* | Chemotaxis protein | 1,688,657-1,689,286 |
|  | *cheD* | Chemotaxis protein | 1,689,283-1,689,783 |
|  | *cheY* | Chemotaxis protein | 1,889,530-1,889,856 |
|  | *cheR* | Chemotaxis protein methyltransferase | 2,373,962-2,374,894 |
|  | *cheW* | Chemotaxis signal transduction protein | 1,404,884-1,405,768 |
|  | *cheZ* | Chemotaxis phosphatase | 1,122,677-1,123,552 |
|  | *cheV* | Chemotaxis protein | 1,404,884-1,405,768 |
|  | *motA* | Chemotaxis protein | 2,989,516-2,990,331 |
|  | *motB* | Chemotaxis protein | 2,988,837-2,989,526 |
|  | *mcpA* | Methyl-accepting chemotaxis protein | 3,109,897-3,111,882 |
|  | *mcpB* | Methyl-accepting chemotaxis protein | 3,114,183-3,116,168 |
|  | *fligG* | Flagellar motor switch protein | 1,667,572-1,668,588 |
|  | *fliM* | Flagellar motor switch protein | 1,675,021-1,676,019 |
|  | *fliN/Y* | Flagellar motor switch protein | 1,676,009-1,677,145 |
|  | *tlpB* | Methyl-accepting chemotaxis protein | 3,107,775-3,109,781 |
| Stress tolerance | *clpB* | ATP-dependent Clp protease | 1,371,924-1,373,972 |
|  | *clpE* | ATP-dependent protease ATP-binding subunit ClpE | 1,371,924-1,373,972 |
|  | *dnaJ* | molecular chaperone DnaJ | 2,680,075-2,681,202 |
|  | *dnaE* | DNA polymerase III subunit alpha | 2,939,024-2,942,371 |
|  | *proA* | glutamate-5-semialdehyde dehydrogenase | 1,321,034-1,322,281 |
|  | *proB* | glutamate 5-kinase | 1,319,925-1,321,037 |
|  | *betB* | betaine-aldehyde dehydrogenase | 3,096,403-3,097,875 |
|  | *cspA* | cold shock protein | 531,604-531,807 |
|  | *atpA* | F-type H+-transporting ATPase subunit alpha | 3,668,216-3,669,724 |
|  | *nhaC* | Na+:H+ antiporter | 2,443,291-2,444,697 |
|  | *opuA* | osmoprotectant transport system ATP-binding protein | 3,375,708-3,376,853 |
|  | *proP* | proline/betaine transporter | 523,476-524,879 |
|  | *treB* | PTS system, trehalose-specific IIB component | 821,770-823,221 |
|  | *sigB* | RNA polymerase sigma-B factor | 514,796-515,584 |
|  | *comA* | two-component system, NarL family, sensor histidine kinase ComA | 1,248,665-1,249,330 |
|  | *comP* | wo-component system, NarL family, sensor histidine kinase ComP | 3,158,153-3,159,337 |
|  | *degS* | two-component system, NarL family, sensor histidine kinase DegS | 3,537,179-3,538,297 |
|  | *degU* | two-component system, NarL family, sensor histidine kinase DegU | 3,536,413-3,537,036 |
| Secondary metabolites | *srfAA* | surfactin non-ribosomal peptide synthetase SrfAA | 362,784-373,538 |
|  | *srfAB* | surfactin non-ribosomal peptide synthetase SrfAB | 373,560-384,320 |
|  | *srfAC* | surfactin non-ribosomal peptide synthetase SrfAC | 384,355-388,191 |
|  | *srfAD* | surfactin non-ribosomal peptide synthetase SrfAC | 388,211-388,942 |
|  | *pksF* | Polyketide biosynthesis malonyl-ACP decarboxylase PksF | 997,079-998,323 |
|  | *pksE* | trans-AT polyketide synthase, acyltransferase and oxidoreductase domains | 1,452,539-1,454,938 |
|  | *pks* | Acyl transferase domain in polyketide synthase (PKS) enzymes | 1,467,210-1,471,982 |
|  | *pksC* | polyketide biosynthesis malonyl-CoA-[acyl-carrier-protein] transacylase | 1,759,531-1,760,412 |
|  | *pksD* | bacillaene synthase trans-acting acyltransferase | 1,760,603-1,761,523 |
|  | *pksG* | Polyketide biosynthesis 3-hydroxy-3-methylglutaryl-ACP synthase | 1,764,131-1,765,393 |
|  | *pksJ* | Polyketide synthase | 1,766,962-1,781,916 |
|  | *pksL* | Polyketide synthase | 1,781,900-1,795,336 |
|  | *PksM* | Polyketide synthase | 1,795,354-1,805,895 |
|  | *pksN* | Polyketide synthase | 1,805,885-1,822,183 |
|  |  |  |  |

Table S2. Predicted genes associated with PGP activity in Ba.YN.J3 genome

| Ba.YN.J3-PGP activities description | Gene name | Gene annotation | Chromosome location |
| --- | --- | --- | --- |
| Nitrogen fixation | *yutI* | Putative nitrogen fixation protein | 3,218,141-3,218,401 |
|  | *nifU* | Nitrogen fixation protein | 3,257,360-3,257,803 |
|  | *nifU* | nitrogen fixation protein | 3,257,360-3,257,803 |
|  | *nifS* | Putative cysteine desulfurase | 2,797,824-2,798,975 |
|  | *nifF* | Nitrogen fixation protein | 1,415,465-1,415,980 |
|  | *nifH* | iron sulfur cluster binding proteins | 4,054,051-4,054,830 |
|  | *gltB* | glutamate synthase (NADPH) large chain | 2,037,361-2,041,905 |
|  | *NarK* | Nitrate/nitrite transporter | 3,452,526-3,453,758 |
| Nitrogen metabolism | *nasE* | Assimilatory nitrite reductase [NAD(P)H] small subunit | 352,319-352,639 |
|  | *nasD* | Nitrite reductase [NAD(P)H] | 352,660-355,077 |
|  | *gudB* | Cryptic catabolic NAD-specific glutamate dehydrogenase | 2,394,478:2,395,752 |
|  | *rocG* | Catabolic NAD-specific glutamate dehydrogenase | 3,760,114-3,761,400 |
| Phosphate metabolism | *pstB1* | Phosphate import ATP-binding protein | 2,633,686-2,634,459 |
|  | *pstB2* | Phosphate import ATP-binding protein | 2,634480-2,635,286 |
|  | *pstA* | Phosphate transport system permease protein | 2,635,305-2,636,189 |
|  | *pstC* | Phosphate transport system permease protein | 2,636,189-2,637,118 |
|  | *pstS* | Phosphate transport system permease protein | 2,637,167-2,638,204 |
|  | *ugpC* | Sn-glycerol-3-phosphate ABC transporter ATP-binding protein | 3,244,152-3,245,258 |
|  | *glpQ* | glycerophosphoryl diester phosphodiesterase | 1,000,708-1,001,424 |
|  | *rsbU* | Phosphoserine phosphatase | 512,951-513,958 |
|  | *pgpH* | Cyclic-di-AMP phosphodiesterase | 2,667,564-2,669,696 |
| Potassium-solubation | *kimA* | Potassium transporter | 471,864-473,708 |
|  | *ktrA* | Ktr system potassium uptake protein A | 3,099,493-3,100,161 |
|  | *ktrC* | K+ transport system regulatory component | 1,176,700-1,178,544 |
|  | *trkA* | Trk system potassium uptake protein | 1,444,805-1,445,470 |
|  | *kdpD* | K+-sensing histidine kinase | 1,919,668-1,921,041 |
| IAA production | *trpA* | Tryptophan synthase alpha chain | 711,962-712,669 |
|  | *trpB* | Tryptophan synthase beta chain | 2,365,905-2,367,107 |
|  | *trpC* | Indole-3-glycerol phosphate synthase | 2,367,746-2,368,498 |
|  | *trpD* | Anthranilate phosphoribosyltransferase | 2,368,491-2,369,507 |
|  | *trpE* | Anthranilate synthase component 1 | 2,369,479-2,371,026 |
|  | *trpP* | Probable tryptophan transport protein | 1,038,504-1,039,055 |


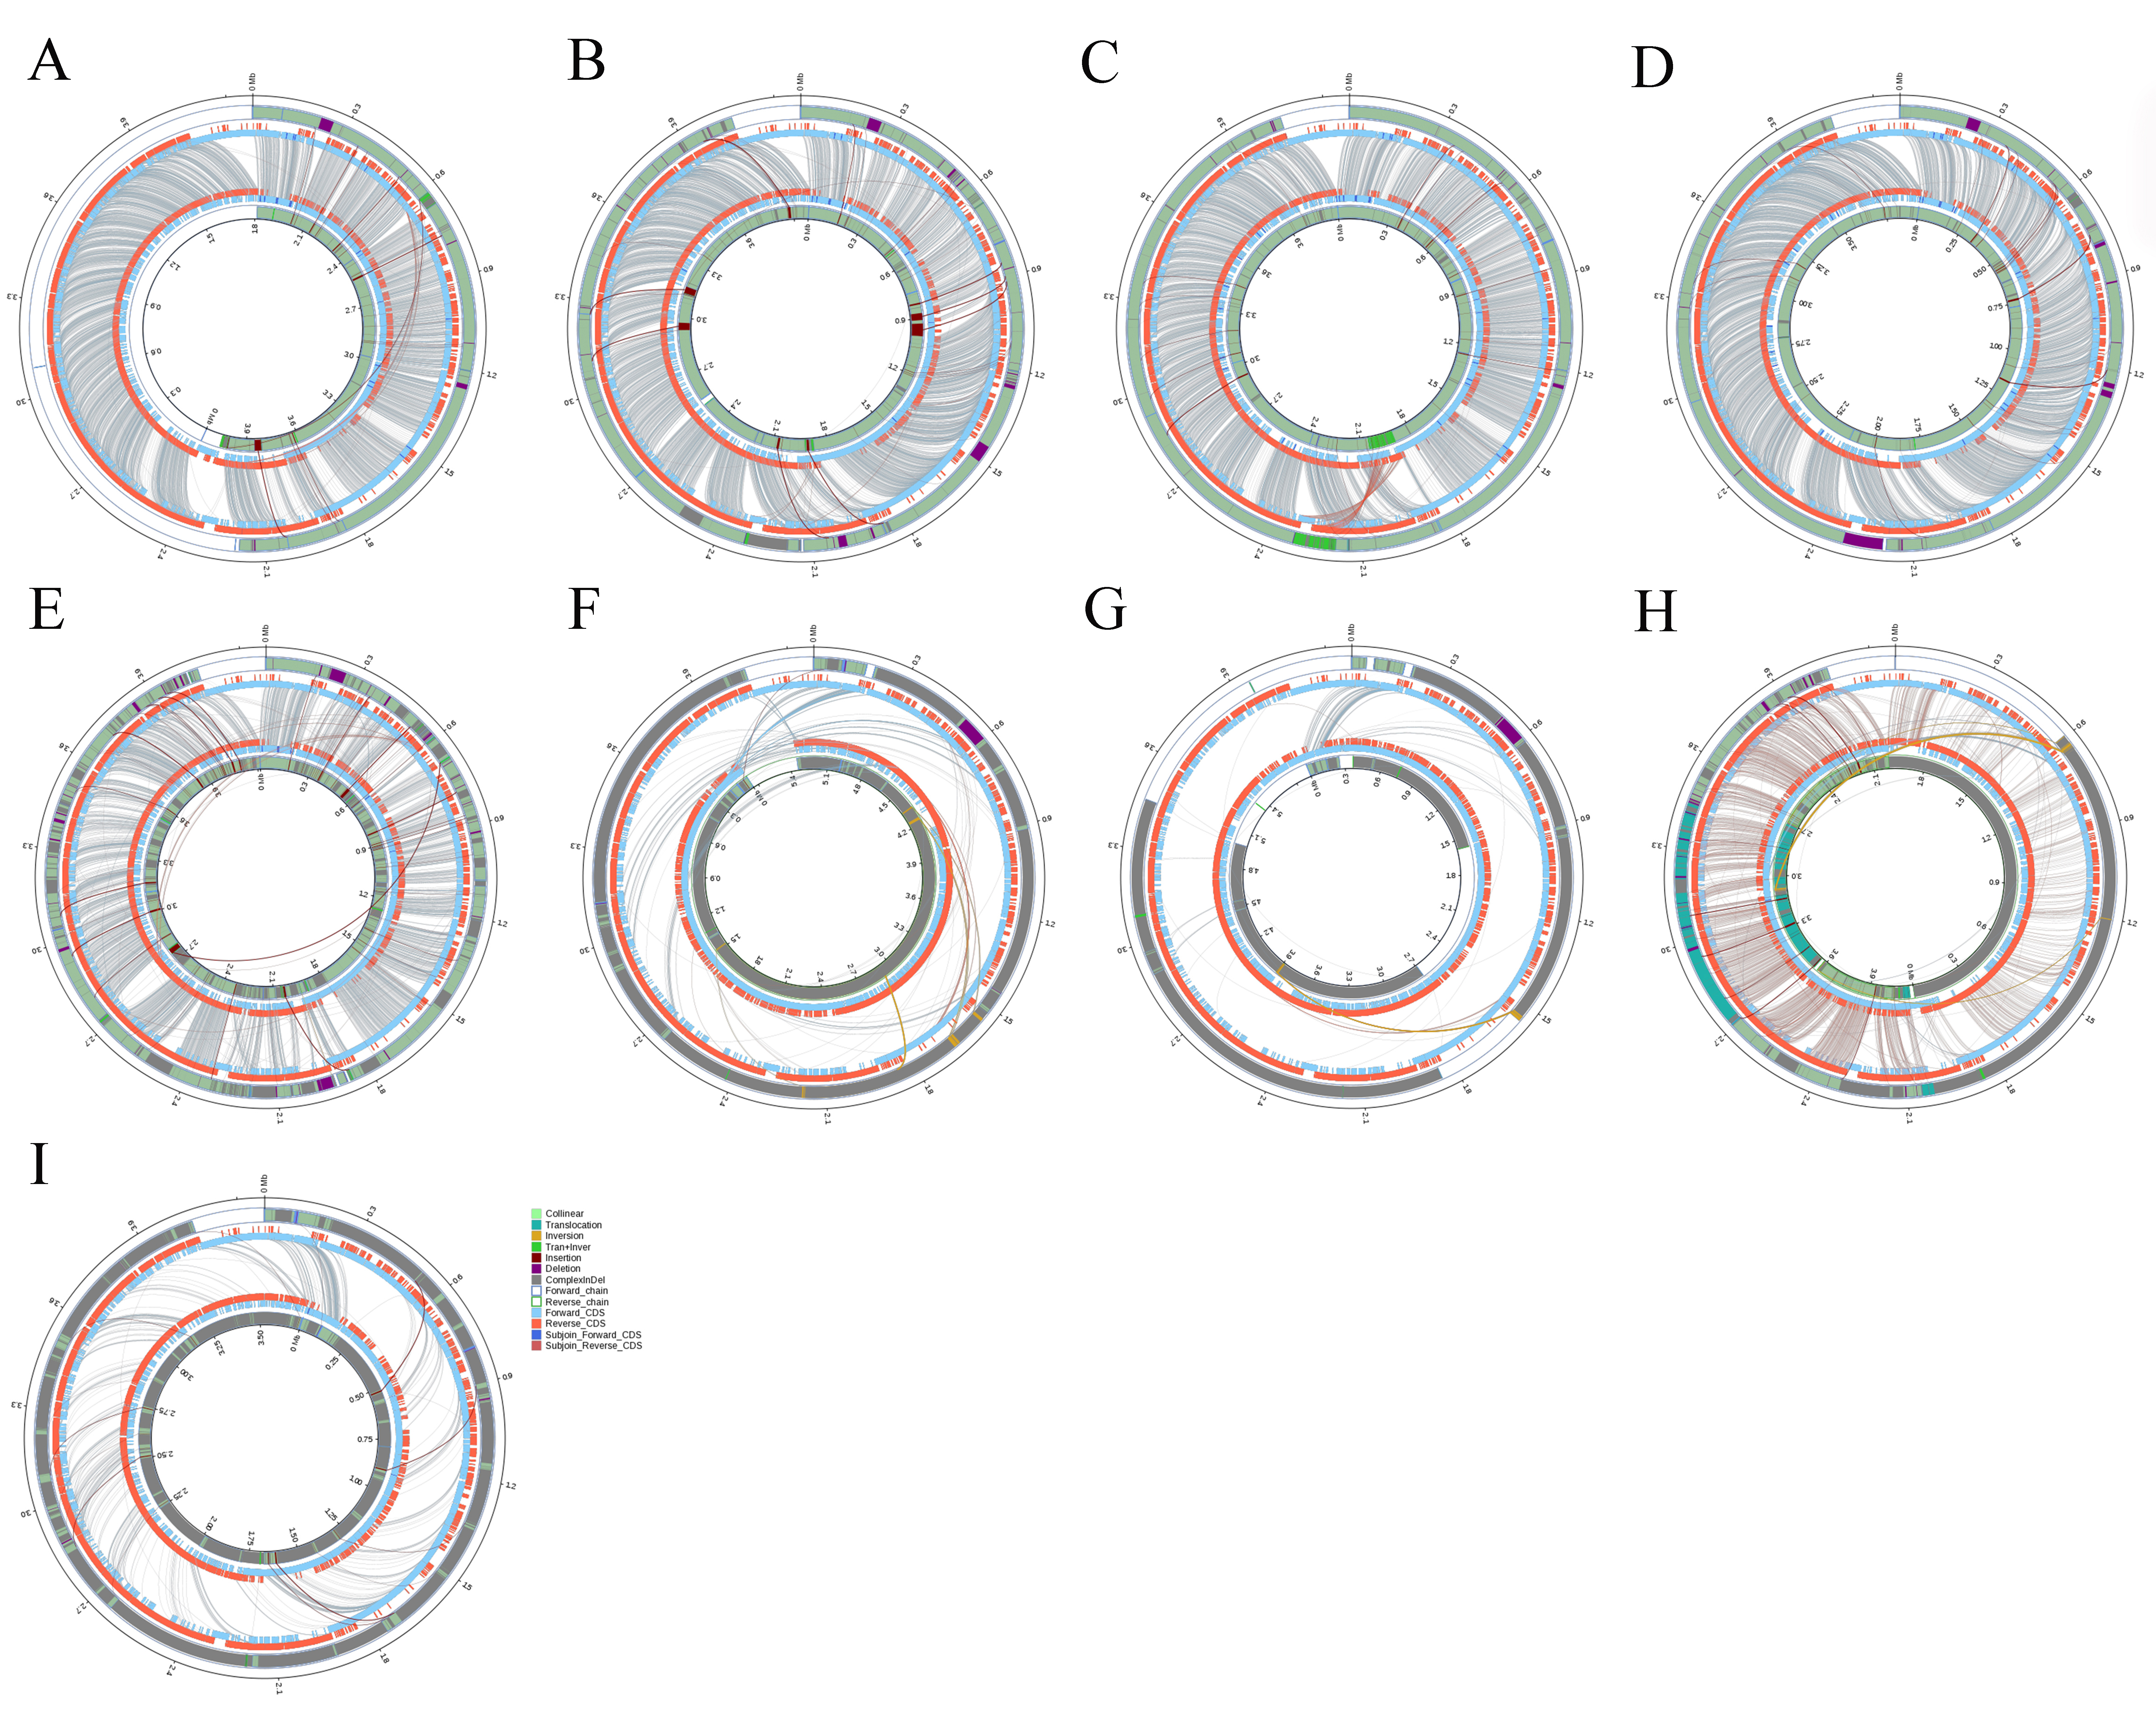


Note: A-I represents Structural variations between Ba.YN.J3 and Ba.GKT04, Ba.DSM7, Ba.ZKY01, Bv.FZB42, Bs.168, Pm.14581, Bc.FORC.047, Bh.ZB201702 and Bp.SAFR.032, respectively.

The inner circle represents the query genome, while the outer circle represents the reference genome. Different colored bands connecting the two circles indicate various genomic rearrangements: Collinear (syntenic regions), Translocation (translocated regions), Inversion (inverted regions), and Tran+Inver (translocated and inverted regions). Insertion and Deletion refer to insertions and deletions of at least 50 bp, respectively. ComplexInDel indicates unaligned but spatially corresponding regions. The directional chains are defined as follows: Forward_chain for sequences on the forward strand with coordinates increasing clockwise, and Reverse_chain for sequences on the reverse strand with coordinates increasing counter-clockwise. Coding sequences (CDS) are further annotated: Forward_CDS and Reverse_CDS represent CDS on the forward and reverse strands, respectively. Subjoin_Forward_CDS and Subjoin_Forward_CDS denote additional CDS from the forward and reverse strands. In cases where the paired sequences of DeleteGene or InsertGene have 100% identity, they are annotated as supplementary CDS.

Figure S1. Structural variations between Ba. YN.J3 and nine conparative *Bacillus* strains
